# Supplementary material for: The safety and effectiveness of chenodeoxycholic acid treatment in patients with cerebrotendinous xanthomatosis: two retrospective cohort studies
Source: Springer Nature journal article supplement (doi:10.1007/s10072-019-04169-8), 2019-12-20
Supplement: MOESM1 [file 17687280]

# **The Safety and Effectiveness of Chenodeoxycholic Acid Treatment in Patients with Cerebrotendinous Xanthomatosis: Two Retrospective Cohort Studies**

## *Neurological Sciences*

Verrips A,<sup>1</sup> Dotti MT,<sup>2</sup> Mignarri A,<sup>2</sup> Stelten BML,<sup>3</sup> Verma S,<sup>4</sup> Federico A<sup>2</sup>

<sup>1</sup>Canisius-Wilhelmina Hospital, Nijmegen, The Netherlands; <sup>2</sup>Department of Medicine, Surgery and Neuroscience, University of Siena, Siena, Italy; <sup>3</sup>Catharina Hospital, Eindhoven, The Netherlands; <sup>4</sup>Leadiant Biosciences Ltd., London, United Kingdom.

**Correspondence to:** Dr Aad Verrips ([A.Verrips@cwz.nl](mailto:A.Verrips@cwz.nl); +31-24-3658765)

## **SUPPLEMENTAL MATERIAL**

### **Statistical Analyses (Both Studies)**

Descriptive statistics are presented, including patient number (n) and frequency (%), arithmetic mean, 95% confidence intervals (95% CI), and median. Missing values were included in the denominator count when computing percentages. Changes from baseline at V1, V2 and CCC visit were evaluated using a paired t-test, and statistical significance declared if the rounded p-value was  $\leq 0.05$ . In the NL study, sub-analyses were conducted based on patients' age at treatment initiation (<21 or  $\geq 21$  years), as studies have demonstrated differences in outcomes depending on age at diagnosis and at treatment initiation [1].

The analysis of 7 $\alpha$ -hydroxy-4-cholesten-3-one was based on a mixed model for repeated measures, with change from baseline in 7 $\alpha$ -hydroxy-4-cholesten-3-one at V1 and V2 as dependent variables, visit as a fixed effect, and the baseline and baseline  $\times$  visit interaction as covariates. An unstructured covariance matrix was considered, and the Kenward-Roger adjustment was used for the degrees of freedom.

**Supplemental Table 1.** Urinary bile alcohols (NL study only; evaluable population)

| PT Visits                         | Baseline Visit |                 |         |                  |            |
|-----------------------------------|----------------|-----------------|---------|------------------|------------|
| n (%)                             | Elevated       | Mildly elevated | Normal  | Missing/not done | Total      |
| <b>V1 (n=31)</b>                  |                |                 |         |                  |            |
| <b>Elevated</b>                   | 3 (9.7)        | 0 (0.0)         | 0 (0.0) | 0 (0.0)          | 3 (9.7)    |
| <b>Mildly elevated</b>            | 12 (38.7)      | 0 (0.0)         | 0 (0.0) | 0 (0.0)          | 12 (38.7)  |
| <b>Normal</b>                     | 6 (19.4)       | 0 (0.0)         | 0 (0.0) | 0 (0.0)          | 6 (19.4)   |
| <b>Missing/not done</b>           | 8 (25.8)       | 0 (0.0)         | 0 (0.0) | 2 (6.5)          | 10 (32.3)  |
| <b>Total</b>                      | 29 (93.5)      | 0 (0.0)         | 0 (0.0) | 2 (6.5)          | 31 (100.0) |
| p-value (Test of symmetry) <0.001 |                |                 |         |                  |            |
| <b>V2 (n=31)</b>                  |                |                 |         |                  |            |
| <b>Elevated</b>                   | 0 (0.0)        | 0 (0.0)         | 0 (0.0) | 0 (0.0)          | 0 (0.0)    |
| <b>Mildly elevated</b>            | 7 (22.6)       | 0 (0.0)         | 0 (0.0) | 0 (0.0)          | 7 (22.6)   |
| <b>Normal</b>                     | 10 (32.3)      | 0 (0.0)         | 0 (0.0) | 2 (6.5)          | 12 (38.7)  |
| <b>Missing/not done</b>           | 12 (38.7)      | 0 (0.0)         | 0 (0.0) | 0 (0.0)          | 12 (38.7)  |
| <b>Total</b>                      | 29 (93.5)      | 0 (0.0)         | 0 (0.0) | 2 (6.5)          | 31 (100.0) |
| p-value (Test of symmetry) <0.001 |                |                 |         |                  |            |
| <b>CCC visit (n=31)</b>           |                |                 |         |                  |            |
| <b>Elevated</b>                   | 3 (9.7)        | 0 (0.0)         | 0 (0.0) | 0 (0.0)          | 3 (9.7)    |
| <b>Mildly elevated</b>            | 4 (12.9)       | 0 (0.0)         | 0 (0.0) | 0 (0.0)          | 4 (12.9)   |
| <b>Normal</b>                     | 6 (19.4)       | 0 (0.0)         | 0 (0.0) | 1 (3.2)          | 7 (22.6)   |
| <b>Missing/not done</b>           | 16 (51.6)      | 0 (0.0)         | 0 (0.0) | 1 (3.2)          | 17 (54.8)  |
| <b>Total</b>                      | 29 (93.5)      | 0 (0.0)         | 0 (0.0) | 2 (6.5)          | 31 (100.0) |
| p-value (Test of symmetry) <0.001 |                |                 |         |                  |            |

Abbreviations: CCC: Current clinical condition; NL: The Netherlands; V1: Post-treatment visit 1; V2: Post-treatment visit 2.

**Supplemental Table 2.** Adverse events and serious adverse events (safety populations)

|                                                                                 | NL Study (N=35) |                  | IT Study (N=28) |                  |
|---------------------------------------------------------------------------------|-----------------|------------------|-----------------|------------------|
|                                                                                 | n (%)           | Number of events | n (%)           | Number of events |
| <b>Any AE</b>                                                                   | 26 (74.3)       | 76               | 9 (32.1)        | 16               |
| <b>Surgical and medical procedures</b>                                          | 11 (31.4)       | 18               | 6 (21.4)        | 9                |
| <b>Musculoskeletal and connective tissue disorders</b>                          | 6 (17.1)        | 7                | -               | -                |
| <b>Gastrointestinal disorders</b>                                               | 5 (14.3)        | 7                | 2 (7.1)         | 2                |
| <b>General disorders and administration site conditions</b>                     | 5 (14.3)        | 5                | -               | -                |
| <b>Injury, poisoning and procedural complications</b>                           | 5 (14.3)        | 5                | 1 (3.6)         | 1                |
| <b>Cardiac disorders</b>                                                        | 4 (11.4)        | 5                | -               | -                |
| <b>Skin and subcutaneous tissue disorders</b>                                   | 4 (11.4)        | 4                | -               | -                |
| <b>Hepatobiliary disorders</b>                                                  | 3 (8.6)         | 3                | 1 (3.6)         | 1                |
| <b>Infections and infestations</b>                                              | 3 (8.6)         | 4                | -               | -                |
| <b>Metabolism and nutrition disorders</b>                                       | 3 (8.6)         | 3                | -               | -                |
| <b>Nervous system disorders</b>                                                 | 3 (8.6)         | 3                | -               | -                |
| <b>Eye disorders</b>                                                            | 2 (5.7)         | 2                | 1 (3.6)         | 1                |
| <b>Immune system disorders</b>                                                  | 2 (5.7)         | 2                | -               | -                |
| <b>Psychiatric disorders</b>                                                    | 2 (5.7)         | 2                | -               | -                |
| <b>Respiratory, thoracic and mediastinal disorders</b>                          | 2 (5.7)         | 2                | -               | -                |
| <b>Vascular disorders</b>                                                       | 2 (5.7)         | 2                | -               | -                |
| <b>Investigations<sup>[a]</sup></b>                                             | 1 (2.9)         | 1                | -               | -                |
| <b>Renal and urinary disorders</b>                                              | 1 (2.9)         | 1                | -               | -                |
| <b>Neoplasms benign, malignant and unspecified (including cysts and polyps)</b> | -               | -                | 1 (3.6)         | 1                |
| <b>Pregnancy, puerperium and perinatal conditions</b>                           | -               | -                | 1 (3.6)         | 1                |
| <b>Any Serious AE</b>                                                           | 7 (20.0)        | 9                | 9 (32.1)        | 15               |
| <b>Surgical and medical procedures</b>                                          | 3 (8.6)         | 3                | 6 (21.4)        | 9                |

|                                                                                 |         |   |         |   |
|---------------------------------------------------------------------------------|---------|---|---------|---|
| <b>Gastrointestinal disorders</b>                                               | -       | - | 2 (7.1) | 2 |
| <b>Cardiac disorders</b>                                                        | 1 (2.9) | 1 | -       | - |
| <b>Eye disorders</b>                                                            | -       | - | 1 (3.6) | 1 |
| <b>Injury, poisoning and procedural complications</b>                           | 1 (2.9) | 1 | 1 (3.6) | 1 |
| <b>Musculoskeletal and connective tissue disorders</b>                          | 1 (2.9) | 1 | -       | - |
| <b>Psychiatric disorders</b>                                                    | 1 (2.9) | 1 | -       | - |
| <b>Renal and urinary disorders</b>                                              | 1 (2.9) | 1 | -       | - |
| <b>Respiratory, thoracic and mediastinal disorders</b>                          | 1 (2.9) | 1 | -       | - |
| <b>Neoplasms benign, malignant and unspecified (including cysts and polyps)</b> | -       | - | 1 (3.6) | 1 |
| <b>Pregnancy, puerperium and perinatal conditions</b>                           | -       | - | 1 (3.6) | 1 |

[a] Weight increased. Patients are only counted once for each row in the column "n (%)" and percentages are calculated based on the number of patients (N). Abbreviations: IT: Italy; NL: The Netherlands.

## REFERENCE

1. Yahalom G, Tsabari R, Molshatzki N, Ephraty L, Cohen H, Hassin-Baer S (2013) Neurological outcome in cerebrotendinous xanthomatosis treated with chenodeoxycholic acid: early versus late diagnosis. *Clinical neuropharmacology* 36 (3):78-83. doi:10.1097/WNF.0b013e318288076a
